# Supplementary material for: Framing and Themes of the City of Boulder's Sugar-Sweetened Beverage Tax Coverage in the Local News From 2016 to 2018
Source: PubMed Central journal article supplement — AJPM Focus. 2023 Jan 20;2(2):100068. doi: 10.1016/j.focus.2023.100068 (PMC10546592; doi:10.1016/j.focus.2023.100068), 2023-01-20
Supplement: mmc1.pdf [file mmc1.pdf]

## Appendix

|                                                                                          |    |
|------------------------------------------------------------------------------------------|----|
| Appendix Table 1. Complete list of search terms.....                                     | 2  |
| Appendix Table 2. List of all retrieved news articles from the <i>Daily Camera</i> ..... | 3  |
| Appendix Table 3. Themes and their complete descriptions in the study codebook....       | 8  |
| Appendix Table 4. Citations of articles from which quotes were presented.....            | 10 |

**Appendix Table 1. Complete list of search terms**

| Search order | Search terms <sup>a</sup>        | Number of articles retrieved from each search | Number of unique (non-duplicate) articles retrieved from each search |
|--------------|----------------------------------|-----------------------------------------------|----------------------------------------------------------------------|
| 1st          | sugary drink <u>or</u> sugar tax | 124                                           | 124                                                                  |
| 2nd          | soda tax                         | 130                                           | 55                                                                   |
| 3rd          | sugar sweetened beverage         | 49                                            | 12                                                                   |
| 4th          | 2H                               | 72                                            | 19                                                                   |
| 5th          | 2D                               | 27                                            | 1                                                                    |
| 6th          | health equity                    | 109                                           | 3                                                                    |
| 7th          | heath equity fund                | 29                                            | 1                                                                    |
| 8th          | big soda                         | 48                                            | 2                                                                    |
| 9th          | “Healthy Boulder Kids”           | 72                                            | 4                                                                    |
| 10th         | kids <u>and</u> soda             | 97                                            | 0                                                                    |
| 11th         | kids <u>and</u> sugar            | 96                                            | 3                                                                    |
| Total        | -                                |                                               | 224 <sup>b</sup>                                                     |

Note: This table shows the complete list of search terms used to search *Daily Camera* articles in the NewsBank database, order in which they were searched, and results for number of articles retrieved and screened.

<sup>a</sup> Filter: Published within the date range of 1/1/2016 to 12/31/2018.

<sup>b</sup> A total of 56 articles were not relevant, and 16 mentioned the tax only peripherally and were not included in the analysis.

**Appendix Table 2. List of all retrieved news articles from the *Daily Camera***

| Date    | Author(s)                | Title                                                                                   |
|---------|--------------------------|-----------------------------------------------------------------------------------------|
| 4/21/16 | Charlie Brennan          | Excise tax on soda, sugary drinks could make it to Boulder ballot                       |
| 4/29/16 | Wayne Pilger             | Wayne Pilger: Boulder follies piling up                                                 |
| 5/3/16  | Lynn Gilbert             | Lynn Gilbert: For healthy kids, support tax on sugary drinks                            |
| 5/5/16  | Larry Yokell             | Larry Yokell: More excise taxes for Boulder                                             |
| 5/9/16  | Victoria Olson           | Victoria Olson: Support ballot issue on sugary drinks                                   |
| 6/10/16 | Nicole Rajpal            | Nicole Rajpal: Support sugary drinks ballot initiative                                  |
| 6/25/16 | Jorge de Santiago        | Jorge De Santiago: Join Healthy Boulder Kids ballot initiative                          |
| 6/27/16 | Carah Wertheimer         | Sugary-drinks excise tax appears headed for Boulder ballot                              |
| 7/2/16  | Dave Krieger             | Editorial: In defense of ice cream                                                      |
| 7/11/16 | Alex Burness             | Checking in on Boulder's four citizen-initiated ballot petitions                        |
| 7/21/16 | M.C. Sleater             | M.C. Sleater: Who is behind the sugary drinks ballot issue?                             |
| 7/19/16 | Alex Burness             | Boulder council rejects city attorney's advice on sugary-drink tax's ballot language    |
| 7/23/16 | A. Allyn Harker          | A. Allyn Harker: Obesity, diabetes on the rise in Boulder                               |
| 7/23/16 | Eric Harker              | Dr. Eric Harker: Black Lives Matter: A public health perspective                        |
| 8/2/16  | Alex Burness             | Boulder council sends term limits, sugary drink tax to ballot — but passes on pay raise |
| 8/7/16  | Kristen Daly             | Kristen Daly: Clarifying information about sugary drinks, Tuesday's meeting             |
| 8/8/16  | Alex Burness             | Citizens challenge validity of Boulder's petition-backed ballot measures                |
| 8/10/16 | Alex Burness             | Boulder sets hearings for ballot-measure protests                                       |
| 8/16/16 | Alex Burness             | With protest unsettled, Boulder council delays final action on soda tax ballot measure  |
| 8/18/16 | Alex Burness             | Boulder hears challenges to citizen-backed ballot measures                              |
| 8/22/16 | Alex Burness             | Boulder voters allege phone poll about soda tax was thinly veiled advocacy              |
| 8/23/16 | Jose D. Beteta           | Jose D. Beteta: Latino Chamber supports sugary drink tax                                |
| 8/23/16 | Alex Burness             | Backers of Boulder soda tax admit to using phone poll to test opposition rhetoric       |
| 8/24/16 | Jim Martin               | Jim Martin: Big Soda is Goliath                                                         |
| 8/25/16 | Alex Burness             | Boulder eyes study showing soda tax cuts consumption in low income neighborhoods        |
| 8/29/16 | Alex Burness             | American Beverage Association begins phone polling on Boulder's soda tax                |
| 8/29/16 | Alex Burness             | Boulder clerk rejects soda tax protest, says ballot petition 'not deceptive'            |
| 8/27/16 | Dave Krieger             | Editorial: Let Boulder vote on sugary drinks tax                                        |
| 9/2/16  | Wendy Peters Moschetti   | Wendy Peters Moschetti: Confront the role of sugar                                      |
| 9/5/16  | Camera Staff             | Judge to hear appeal in protest of Boulder soda-tax ballot issue                        |
| 9/6/16  | Bear and Mitchell Byers  | Judge clears way for soda tax to appear on Boulder ballot                               |
| 9/9/16  | Alex Burness             | Big money pours into 'vigorous' Boulder soda-tax fight                                  |
| 9/14/16 | Alex Burness             | American Beverage Association debuts Boulder coalition against sugary drink tax         |
| 9/16/16 | Editorial Advisory Board | From the Editorial Advisory Board : Sugary drinks                                       |
| 9/16/16 | Daniel Booth             | Daniel Booth: Were restaurants subsidized by 'Big Sugar'?                               |
| 9/16/16 | David Hazen              | David Hazen: Boycott these businesses                                                   |
| 9/17/16 | Alex Bogusky             | Alex Bogusky : Let's stop getting sicker                                                |
| 9/18/16 | Amy Bounds               | Boulder County Democrats endorse Boulder's sugary drink tax                             |

| Date     | Author(s)                     | Title                                                                                  |
|----------|-------------------------------|----------------------------------------------------------------------------------------|
| 9/21/16  | Alex Burness                  | Boulder businesses say they were duped by soda industry into joining anti-tax campaign |
| 9/26/16  | Bob Greenlee                  | Bob Greenlee: Good intentions gone astray ?                                            |
| 9/27/16  | Alex Burness                  | High spending continues in fight over sugary drink tax in Boulder                      |
| 9/27/16  | Jim Martin                    | Jim Martin: Big Soda's latest scam                                                     |
| 9/27/16  | Steve Fenberg,<br>Edie Hooton | Steve Fenberg and Edie Hooton: Counter Big Soda with democracy                         |
| 9/27/16  | George Narcavage              | George Narcavage: A tax on poor people                                                 |
| 9/28/16  | Eben Carsey                   | Eben Carsey : A healthier future for all kid s                                         |
| 10/1/16  | Matthew Smith                 | Matthew Smith: Students against sugary drinks tax                                      |
| 10/4/16  | Carolyn J. Tabak              | Carolyn J. Tabak: Passage of 2H critical for children's health                         |
| 10/12/16 | Alex Burness                  | Fight over sugary drink tax is Boulder's most expensive campaign ever                  |
| 10/15/16 | Alex Burness                  | Boulder voters could find tax on sugary drinks to their taste                          |
| 10/15/16 |                               | Boulder Issue 2H: Sugar-sweetened beverages tax                                        |
| 10/18/16 | Spense Havlick                | Spense Havlick: Unscrambling election confusion                                        |
| 10/19/16 | Tina Marquis                  | Tina Marquis: Help close the health gap with 2H                                        |
| 10/20/16 | Alex Burness                  | Bernie Sanders tells soda lobby to remove him from anti-tax ads                        |
| 10/20/16 | Dave Krieger                  | Editorial: Boulder should lead on sugary drinks                                        |
| 10/20/16 | Dennis Zuiker                 | Dennis Zuiker: Get out of our lives and leave us alone                                 |
| 10/20/16 | Simon Smith                   | Simon Smith: Yes on Amendment 72 and Issue 2H for a healthier community                |
| 10/20/16 | Dennis Lewis                  | Dennis Lewis: Sugar attacks oral health                                                |
| 10/20/16 | Kyle Chessman                 | Kyle Chessman: 2H against the concept of personal liberty                              |
| 10/22/16 | John Hayes                    | John Hayes: Sugary drinks tax will hurt businesses                                     |
| 10/24/16 | Meg Collins                   | Meg Collins: Where's the money coming from to back 2H?                                 |
| 10/25/16 | Alex Burness                  | Fundraising over Boulder soda tax fight now at \$1.34M                                 |
| 10/25/16 | David Kidd                    | David Kidd : No on 2H                                                                  |
| 10/25/16 | Willow King                   | Willow King: Yes on 2H                                                                 |
| 10/26/16 | Alex Burness                  | Bernie Sanders distances himself from anti-soda tax movement in Boulder                |
| 10/27/16 | Alex Burness                  | Harvard : Sugary drink tax would cut disease rates, health care costs in Boulder       |
| 10/27/16 | Alex Burness                  | Michael Bloomberg donates \$200,000 to group pushing Boulder soda tax                  |
| 10/27/16 | Alan Greenberg                | Alan Greenberg : Vote yes on 2H                                                        |
| 10/27/16 | Evan Darling                  | Evan Darling : 2H goes too far                                                         |
| 10/28/16 | David Brandt                  | David Brandt: 2H is too selective                                                      |
| 10/29/16 | Ken and Kay<br>Foelske        | Ken and Kay Foelske: More carrot, less stick on sugary drinks                          |
| 10/29/16 | Stephen Thomas                | Stephen Thomas: Support 2H for its health benefits                                     |
| 10/31/16 | Phil Day                      | Phil Day : 2H is a slippery slope                                                      |
| 11/1/16  | Peter Arts                    | Peter Arts: 2H sets dangerous precedent                                                |
| 11/1/16  | Jamba Dunn                    | Jamba Dunn: Unintended consequences of 2H                                              |
| 11/1/16  | Christa Ambrose               | Christa Ambrose: The sweet side of 2H                                                  |
| 11/2/16  | Alex Burness                  | Kombucha an unexpected casualty of Boulder sugary drink tax plan                       |
| 11/2/16  | Mary Dolores<br>Young         | Mary Dolores Young : Fight diabetes; yes on 2H                                         |
| 11/3/16  | Dave Boylan                   | Dave Boylan: Saving us from ourselves                                                  |
| 11/3/16  | Alex Burness                  | Soda tax fight nearly twice as expensive as any other campaign in Boulder History      |
| 11/3/16  | Robert Ito                    | Robert Ito: Find a better way than 2H                                                  |

| Date     | Author(s)                                           | Title                                                                                                                              |
|----------|-----------------------------------------------------|------------------------------------------------------------------------------------------------------------------------------------|
| 11/4/16  | Alex Burness                                        | With light proof, group against Boulder sugary drink tax questions opponent's funding                                              |
| 11/5/16  | Nancy Brown                                         | Nancy Brown: Some facts on sugary drinks from the American Heart Association                                                       |
| 11/5/16  | Jeffrey R. Metzger                                  | Jeffrey R. Metzger: Reasons to oppose 2H                                                                                           |
| 11/5/16  | Richard Bixby                                       | Richard Bixby : Halloween and 2H: What's wrong with this picture?                                                                  |
| 11/5/16  | Lynn Gilbert, Eben Carsey                           | Lynn Gilbert and Eben Carsey : Soda tax is for kids                                                                                |
| 11/5/16  | Sean Ahearn                                         | Sean Ahearn: Tax backers trying to exert unnecessary control                                                                       |
| 11/5/16  | Don Horton                                          | Don Horton: What is the sound of disease prevention?                                                                               |
| 11/8/16  | Amelia Arvesen                                      | Boulder throws out election complaint against backers of sugary drink tax                                                          |
| 11/8/16  | Alex Burness                                        | Boulder becomes nation's second city to vote in a soda tax                                                                         |
| 11/8/16  | Mitchell Byars and John Fryar                       | Where to vote today in Boulder County                                                                                              |
| 11/10/16 | Julissa Soto                                        | Julissa Soto: Tax on sugary beverages will help prevent type 2 diabetes                                                            |
| 11/12/16 | Jeff Zayach                                         | Jeff Zayach: Boulder makes history                                                                                                 |
| 11/21/16 | Alex Burness                                        | Boulder passed the nation's steepest soda tax; now, to implement it                                                                |
| 11/26/16 | Elena Aranda                                        | Elena Aranda: Boulder has a health equity problem                                                                                  |
| 12/26/16 | Sarah Kuta                                          | Top 10 local news stories of 2016: No. 5 &md ash; Boulder voters approve sugary drink tax after costliest campaign in city history |
| 12/29/16 | Kevin Gilbert                                       | Kevin Gilbert: Volunteers, community key to 2H's success                                                                           |
| 2/14/17  | John Bear                                           | Boulder department wants increased emphasis on combating poverty                                                                   |
| 2/27/17  | Alex Burness                                        | Boulder ponders how to spend revenue from upcoming soda tax                                                                        |
| 3/13/17  | Jim Martin                                          | Jim Martin: Soda tax should be spent as voters intended                                                                            |
| 3/18/17  | Jane Brautigam                                      | Jane S. Brautigam: Boulder will use soda tax for intended purpose                                                                  |
| 5/6/17   | Alex Burness                                        | Kombucha brewers, liquor stores and others plea for Boulder soda tax exemptions                                                    |
| 5/16/17  | Alex Burness                                        | Boulder spares mixers and CU from soda tax; more amendments may come                                                               |
| 5/19/17  | Editorial Advisory Board                            | From the Editorial Advisory Board : Sugar off                                                                                      |
| 5/20/17  | Elizabeth Hernandez                                 | Sugary drinks could go down the drain at CU Boulder dining halls                                                                   |
| 5/20/17  | Matt Benjamin                                       | Matt Benjamin: Investing in healthy kids                                                                                           |
| 5/24/17  | Alex Burness                                        | Boulder convenes committee on sugary-drink tax revenue, seeks grantees                                                             |
| 5/26/17  | Lynn Gilbert                                        | Lynn Gilbert: Let's not get bogged down implementing soda tax                                                                      |
| 5/27/17  | Nicole Rajpal                                       | Nicole Rajpal: Reject exemptions to soda tax                                                                                       |
| 5/30/17  | Kristen Daly                                        | Kristen Daly : City Council should get out of the way of soda tax                                                                  |
| 5/31/17  | Alex Burness                                        | Tax backers slam Boulder, say CU exemption 'special tax break to Pepsi;                                                            |
| 6/2/17   | Allyn Harker                                        | Allyn Harker: Don't let City Council cave on soda tax                                                                              |
| 6/5/17   | Jose D. Beteta                                      | Jose D. Beteta: When will Boulder take equality seriously ?                                                                        |
| 6/6/17   | Lee Scriggins on behalf of Healthy Future Coalition | Lee Scriggins, et al.: Mixers should not be exempted from Boulder soda tax                                                         |
| 6/8/17   | Jamba Dunn                                          | Jamba Dunn: Sugar an important energy source                                                                                       |
| 6/9/17   | Jake Williams                                       | Jake Williams: A tax break for Pepsi at the expense of low-income families                                                         |
| 6/16/17  | Alex Burness                                        | Apologizing for bad math, CU drops request for break from Boulder's new sugary drink tax                                           |

| <b>Date</b> | <b>Author(s)</b>                                                                                                                                                           | <b>Title</b>                                                                                                 |
|-------------|----------------------------------------------------------------------------------------------------------------------------------------------------------------------------|--------------------------------------------------------------------------------------------------------------|
| 6/17/17     | Carolyn J. Tabak                                                                                                                                                           | Carolyn J. Tabak: Science says no soda tax exemptions                                                        |
| 7/6/17      | Alex Burness                                                                                                                                                               | Safeway on label errors: 'Never any intent to make a profit' off Boulder sugary drink tax                    |
| 7/15/17     | Claudia Lewis                                                                                                                                                              | Claudia Lewis: Government overstep on sugar tax                                                              |
| 8/24/17     | Alex Burness                                                                                                                                                               | Projected soda tax revenue cut in half as Boulder plans how to spend it                                      |
| 2/27/18     | Brian Coppom                                                                                                                                                               | Brian Coppom: Sugary drinks tax making fresh produce available for all                                       |
| 3/14/18     | M. Thorne                                                                                                                                                                  | M. Thorne: Boulder council brings excessive spending , higher taxes                                          |
| 5/7/18      | Alex Burness                                                                                                                                                               | For Boulder's 2018 ballot, fracking , broadband , soda-tax update up for discussion                          |
| 5/8/18      | Alex Burness                                                                                                                                                               | Boulder City Council refines broadband options, considers 2018 ballot measures                               |
| 6/30/18     | Shay Castle                                                                                                                                                                | One year on, critics haven't sweetened on Boulder's soda tax                                                 |
| 7/6/18      | Editorial Advisory Board                                                                                                                                                   | From the Editorial Advisory Board : Sugar tax not all sweetness for city                                     |
| 7/28/18     | Jeff Zayach                                                                                                                                                                | Jeff Zayach: Sugary drink tax surplus should stay in Boulder, not go to industry                             |
| 8/4/18      | Richard Auletta                                                                                                                                                            | Richard Auletta: I just don't get the feeling Boulder wants us                                               |
| 8/10/18     | Eric Harker                                                                                                                                                                | Eric Harker: As a doctor, I strongly favor sugary drink initiative                                           |
| 8/10/18     | Heidi Marchi                                                                                                                                                               | Heidi Marchi: Boulder voters helped ensure better health                                                     |
| 8/13/18     | Shay Castle                                                                                                                                                                | Public to weigh in on 7 proposed ballot items for Boulder election                                           |
| 8/14/18     | Shay Castle                                                                                                                                                                | Sugary drink tax revenue measure headed to Boulder ballots this November                                     |
| 8/19/18     | Lindsey Loberg                                                                                                                                                             | Lindsey Loberg : Benefits of sugary drink tax funds are many                                                 |
| 9/4/18      | Shay Castle                                                                                                                                                                | Final Boulder City Council vote sends pollution tax, sugar sweetened beverage tax revenue measure to ballots |
| 9/11/18     | Chuck Wibby                                                                                                                                                                | Chuck Wibby : No good reason to let city keep surplus sugar tax money                                        |
| 9/17/18     | Shay Castle                                                                                                                                                                | When a tax is not a tax: Boulder's sugary drink policy creates confusion                                     |
| 9/24/18     | Alexander Harrity                                                                                                                                                          | Food assistance recipients can now double up on fruits and veggies at Whole Foods on Pearl Street in Boulder |
| 9/29/18     | Eben Carsey                                                                                                                                                                | Eben Carsey : Vote yes on 2D, the sugary drink tax                                                           |
| 10/6/18     | Quentin Young for the Editorial Board                                                                                                                                      | Editorial: Not a fan of sugary drink tax? Don't take it out on Issue 2D.                                     |
| 10/11/18    | Schivonne Keller                                                                                                                                                           | Schivonne Keller: Health Equity Fund helps people avoid diseases                                             |
| 10/12/18    | Daily Camera                                                                                                                                                               | Boulder Ballot Issue 2D: Sugar-Sweetened Beverage Tax Revenues                                               |
| 10/18/18    | Neal Norman                                                                                                                                                                | Neal Norman: Sugary drink tax helps provide access to nutritious food                                        |
| 10/20/18    | Robyn Harmon                                                                                                                                                               | Robyn Harmon: Support health and equity with yes vote on Ballot Issue 2D                                     |
| 10/21/18    | Sean Maher for the Camera                                                                                                                                                  | Sean Maher: Two local ballot issues worth a look                                                             |
| 10/24/18    | Signed by Lisa Atallah, executive director, Grove Foundation; Brian Coppom, executive director, Boulder County Farmers Markets; Hayden Dansky, executive director, Boulder | Nonprofit leaders unite in support of Boulder Issue 2D                                                       |

| Date     | Author(s)                                                                                                                                                                                                                                                                                                                                                                                                                   | Title                                                                                              |
|----------|-----------------------------------------------------------------------------------------------------------------------------------------------------------------------------------------------------------------------------------------------------------------------------------------------------------------------------------------------------------------------------------------------------------------------------|----------------------------------------------------------------------------------------------------|
|          | Food Rescue; Julie Van Domelen, executive director, Emergency Family Assistance Association; Ernest Duff, executive director, Dental Aid; Brenda Lyle, executive director, Family Learning Center; Debbie Pope, executive director, YWCA Boulder; Jennifer Shriver, development director, Community Cycles; Jorge De Santiago, executive director, El Centro Amistad; Simon Smith, president and CEO Clinica Family Health. |                                                                                                    |
| 10/25/18 | Debbie Pope                                                                                                                                                                                                                                                                                                                                                                                                                 | Debbie Pope: YWCA urges yes vote on 2D                                                             |
| 10/27/18 | Shay Castle                                                                                                                                                                                                                                                                                                                                                                                                                 | A tale of two taxes: High cost of sugary drinks in Boulder helps residents, but burdens businesses |
| 10/27/18 | Sharon Simmons                                                                                                                                                                                                                                                                                                                                                                                                              | Sharon Simmons: Professional women support Boulder measure 2D                                      |
| 11/3/18  | Quentin Young for the Editorial Board                                                                                                                                                                                                                                                                                                                                                                                       | Editorial: The editorial board 's 2018 endorsements                                                |
| 11/7/18  | Shay Castle                                                                                                                                                                                                                                                                                                                                                                                                                 | Extra cash from Boulder's sugary drinks tax should fill gaps in health funding                     |
| 11/7/18  | Shay Castle                                                                                                                                                                                                                                                                                                                                                                                                                 | Boulder voters support keeping sugary drink tax revenue, funding health initiatives                |
| 12/5/18  | Daily Camera                                                                                                                                                                                                                                                                                                                                                                                                                | Health equity initiatives cleared for \$4.6M in 2019 Boulder sugary drinks tax funds               |

**Appendix Table 3. Themes and their complete descriptions in the study codebook**

| <b>Pro-tax themes</b>                | <b>Description</b>                                                                                                                                                                                                                                                                                                                                                                                                                                                                                                                     |
|--------------------------------------|----------------------------------------------------------------------------------------------------------------------------------------------------------------------------------------------------------------------------------------------------------------------------------------------------------------------------------------------------------------------------------------------------------------------------------------------------------------------------------------------------------------------------------------|
| Unethical actions of “Big Soda”      | <ul style="list-style-type: none"> <li>● Unethical (e.g., deceptive) tactics of the American Beverage Association (ABA) and soda industry or expressed distrust of what Big Soda says.</li> <li>● Targeted marketing: Big Soda’s preferential marketing to children, and children of color particularly, and communities of color.</li> <li>● Comparisons of the soda industry to the tobacco industry.</li> </ul>                                                                                                                     |
| Health                               | <ul style="list-style-type: none"> <li>● Child health and diet-related conditions: Epidemics of obesity or diabetes, children increasingly suffering from diet-related conditions, implications of these conditions for the lifecourse, and racial/ethnic or income disparities in these conditions.</li> <li>● Health risks of sugar-sweetened beverage (SSB) consumption: Citing research on the health harms of SSBs, liquid sugar, or the primary ingredient in SSBs—sugar.</li> </ul>                                             |
| Healthcare costs                     | Costs borne by society from negative health effects of SSB consumption (e.g., burden of healthcare costs on society, cost-savings of improving health, lost productivity costs, and cost effectiveness of SSB taxes or projected savings).                                                                                                                                                                                                                                                                                             |
| Equity                               | <ul style="list-style-type: none"> <li>● Health disparities: Differences in diet-related health outcomes (e.g., diabetes, obesity, heart disease) or SSB consumption by race or ethnicity, nationally or locally; unequal access to healthy activities or health services.</li> <li>● Health equity or racial and social justice: Mentioned explicitly, evening the playing field, and offering opportunities to promote justice and/or equity.</li> </ul>                                                                             |
| Funding benefits                     | (Potential) benefits from SSB tax revenue allocations, including opportunities to lessen health disparities and offer equitable programming for lower-income children and families. In 2018, programs funded by the Health Equity Fund.                                                                                                                                                                                                                                                                                                |
| Efficacy                             | Examples of SSB tax efficacy elsewhere (e.g., Berkeley, Mexico) or of other excise taxes (e.g., tobacco) on consumption.                                                                                                                                                                                                                                                                                                                                                                                                               |
| Clarity                              | Rebuttal to the argument that the measure is confusing or difficult to implement.                                                                                                                                                                                                                                                                                                                                                                                                                                                      |
| Not regressive                       | Rebuttal to the argument that the SSB tax is regressive or arguing that an SSB tax is progressive or not regressive.                                                                                                                                                                                                                                                                                                                                                                                                                   |
| Not a grocery tax                    | Rebuttal to the argument that the tax amounts to a grocery tax.                                                                                                                                                                                                                                                                                                                                                                                                                                                                        |
| Community                            | Benefits, brings together (e.g., funding in 2018), or is the right message for the Boulder community (i.e., tax sends the message that SSBs are unhealthy, and this is the type of community residents want that values health and equity for all).                                                                                                                                                                                                                                                                                    |
| <b>Anti-tax themes</b>               |                                                                                                                                                                                                                                                                                                                                                                                                                                                                                                                                        |
| Unnecessary                          | Boulder is already a healthy place, everyone already knows SSBs are unhealthy.                                                                                                                                                                                                                                                                                                                                                                                                                                                         |
| Government overreach                 | Government overreach (e.g., nanny state, not the role of government to tell people what to buy, paternalism) or slippery slope (e.g., will lead to taxing/banning other things like ice cream).                                                                                                                                                                                                                                                                                                                                        |
| Responsibility                       | Personal choice/responsibility to choose what to eat or drink, parental authority (e.g., it should be up to parents to decide what to feed their children).                                                                                                                                                                                                                                                                                                                                                                            |
| SSB tax does not work                | SSB taxes do not work to reduce consumption; the tax is not doing what it is supposed to (e.g., tax revenues in first year and higher than expected tax revenues indicate the tax is not working to reduce consumption).                                                                                                                                                                                                                                                                                                               |
| Economic                             | The tax hurts local business (e.g., there is already too much regulation in Boulder), will cause people to shop outside of Boulder, or results in a personal cost burden if it makes a preferred SSB too expensive.                                                                                                                                                                                                                                                                                                                    |
| Regressive                           | The tax will be paid by and add additional burden to poor families.                                                                                                                                                                                                                                                                                                                                                                                                                                                                    |
| Confusing or burdensome to implement | <ul style="list-style-type: none"> <li>● Confusing: The measure is poorly written, confusing to businesses.</li> <li>● The measure did not have a TABOR provision, which ABA argued it needed.</li> <li>● Business uncertain about how will affect them (e.g., because it is vague).</li> <li>● Implementation challenges: Consumers were charged for the cost of the tax when they should not have been, burden on businesses to implement.</li> <li>● Boulder City government is not capable of managing or implementing.</li> </ul> |
| Kombucha                             | The tax hurts kombucha businesses, which make lower or natural sugar drinks.                                                                                                                                                                                                                                                                                                                                                                                                                                                           |



| <b>Pro-tax themes</b>                      | <b>Description</b>                                                                                                                                                                                                                                                                                                                                                                            |
|--------------------------------------------|-----------------------------------------------------------------------------------------------------------------------------------------------------------------------------------------------------------------------------------------------------------------------------------------------------------------------------------------------------------------------------------------------|
| Grocery tax                                | The tax amounts to a grocery tax and will raise the price of all groceries. (The anti-group had “grocery tax” in its name. If only the name was mentioned, it was not coded.)                                                                                                                                                                                                                 |
| <b>Neutral themes</b>                      |                                                                                                                                                                                                                                                                                                                                                                                               |
| Politics                                   | What the two campaigns are doing or how those actions interacts with the city government and courts (e.g., signature collection campaign, push polling, getting businesses to sign for support, role of city council in putting the measure on the ballot, wording of the measure, recommendations from city lawyer, description of Healthy Boulder Kids, ABA creation of the anti-campaign). |
| Campaign financing                         | How campaigns were financed, by whom, where money came from, and the fact that the campaign was the most expensive in city history.                                                                                                                                                                                                                                                           |
| Colorado’s Taxpayer Bill of Rights (TABOR) | Legality of the measure within Colorado tax law (ABA challenged in court leading up to ballot). In 2018, what would happen if the money were given back, why the measure was challenged, and whether an excise tax is legal.                                                                                                                                                                  |

ABA—American Beverage Association; SSB—sugar-sweetened beverage; TABOR—Taxpayer Bill of Rights

**Appendix Table 4. Citations of articles from which quotes were presented**

| <b>In-text number</b> | <b>Date</b> | <b>Article title</b>                                                     | <b>Shortened URL</b>                                |
|-----------------------|-------------|--------------------------------------------------------------------------|-----------------------------------------------------|
| 1                     | 10/11/18    | Schivonne Keller: Health Equity Fund helps people avoid diseases         | <a href="https://bit.ly/3DcuwyW">bit.ly/3DcuwyW</a> |
| 2                     | 10/18/16    | Spense Havlick: Unscrambling election confusion                          | <a href="https://bit.ly/3THQDUZ">bit.ly/3THQDUZ</a> |
| 3                     | 7/23/16     | Dr. Eric Harker: Black Lives Matter: A public health perspective         | <a href="https://bit.ly/3tFwnt2">bit.ly/3tFwnt2</a> |
| 4                     | 4/29/16     | Wayne Pilger: Boulder follies piling up                                  | <a href="https://bit.ly/3Dajmuo">bit.ly/3Dajmuo</a> |
| 5                     | 10/31/16    | Phil Day: 2H is a slippery slope                                         | <a href="https://bit.ly/3JAAewV">bit.ly/3JAAewV</a> |
| 6                     | 11/1/16     | Peter Arts: 2H sets dangerous precedent                                  | <a href="https://bit.ly/3NieZ5r">bit.ly/3NieZ5r</a> |
| 7                     | 10/25/16    | David Kidd : No on 2H                                                    | <a href="https://bit.ly/36PqnVi">bit.ly/36PqnVi</a> |
| 8                     | 9/17/18     | When a tax is not a tax: Boulder's sugary drink policy creates confusion | <a href="https://bit.ly/3NIXTmW">bit.ly/3NIXTmW</a> |
